# Supplementary material
Source: PubMed Central journal article supplement (PMC2795538)
Supplement: 0912072106_0912072106SI.pdf [file 0912072106_0912072106SI.pdf]

# Supporting Information

Heinemann et al. 10.1073/pnas.0912072106

|                                                        | gDNA -1<br>in tRNA <sup>His</sup> | thg1          |
|--------------------------------------------------------|-----------------------------------|---------------|
| Crenarchaeota                                          |                                   |               |
| Thermoprotei                                           |                                   |               |
| Desulfurococcales                                      |                                   |               |
| Desulfurococceae                                       |                                   |               |
| Aeropyrum                                              | G                                 | -             |
| <i>Aeropyrum pernix</i> K1                             |                                   |               |
| Desulfurococcus                                        | G                                 | -             |
| <i>Desulfurococcus kamchatkensis</i> 1221n             |                                   |               |
| Ignicoccus                                             | G                                 | degraded thg1 |
| <i>Ignicoccus hospitalis</i> KIN4/I                    |                                   |               |
| Staphylothermus                                        | G                                 | -             |
| <i>Staphylothermus marinus</i> F1                      |                                   |               |
| Pyrodictiaceae                                         |                                   |               |
| Hyperthermus                                           | G                                 | +             |
| <i>Hyperthermus butylicus</i> DSM 5456                 |                                   |               |
| Sulfolobales                                           |                                   |               |
| Sulfobaceae                                            |                                   |               |
| Metallosphaera                                         | G                                 | -             |
| <i>Metallosphaera sedula</i> DSM 5348                  |                                   |               |
| Sulfolobus                                             | G                                 | -             |
| <i>Sulfolobus acidocaldarius</i> DSM 639               |                                   |               |
| <i>Sulfolobus islandicus</i> L.S.2.15                  |                                   |               |
| <i>Sulfolobus islandicus</i> M.14.25                   |                                   |               |
| <i>Sulfolobus islandicus</i> M.16.27                   |                                   |               |
| <i>Sulfolobus islandicus</i> M.16.4                    |                                   |               |
| <i>Sulfolobus islandicus</i> Y.G.57.14                 |                                   |               |
| <i>Sulfolobus islandicus</i> Y.N.15.51                 |                                   |               |
| <i>Sulfolobus solfataricus</i> P2                      |                                   |               |
| <i>Sulfolobus tokodaii</i> 7                           |                                   |               |
| Thermoproteales                                        |                                   |               |
| Thermofilaceae                                         |                                   |               |
| Thermofilum                                            | G                                 | -             |
| <i>Thermofilum pendens</i> Hrk 5                       |                                   |               |
| Thermoproteaceae                                       |                                   |               |
| Caldivirga                                             | G                                 | -             |
| <i>Caldivirga maquilingensis</i> IC-167                |                                   |               |
| Pyrobaculum                                            | A                                 | +             |
| <i>Pyrobaculum aerophilum</i> IN2                      |                                   |               |
| <i>Pyrobaculum arsenaticum</i> DSM 13514               |                                   |               |
| <i>Pyrobaculum calidifontis</i> JCM 11548              |                                   |               |
| <i>Pyrobaculum islandicum</i> DSM 4184                 |                                   |               |
| Thermoproteus                                          | A                                 | +             |
| <i>Thermoproteus neutrophilus</i> V24Sta               |                                   |               |
| Euryarchaeota                                          |                                   |               |
| Archaeoglobi                                           |                                   |               |
| Archaeoglobales                                        |                                   |               |
| Archaeoglobaceae                                       |                                   |               |
| Archaeoglobus                                          | G                                 | -             |
| <i>Archaeoglobus fulgidus</i> DSM 4304                 |                                   |               |
| Candidatus Methanosphaerula                            |                                   |               |
| unclassified                                           |                                   |               |
| unclassified                                           |                                   |               |
| Candidatus                                             |                                   |               |
| Candidatus <i>Methanosphaerula palustris</i> E1-9c     | T                                 | +             |
| Halobacteria                                           |                                   |               |
| Halobacteriales                                        |                                   |               |
| Haloarculaceae                                         |                                   |               |
| Haloarcula                                             | G                                 | -             |
| <i>Haloarcula marismortui</i> ATCC 43049               |                                   |               |
| Halobacteriaceae                                       |                                   |               |
| Halobacterium                                          | G                                 | -             |
| <i>Halobacterium salinarum</i> R1                      |                                   |               |
| <i>Halobacterium</i> sp. NRC-1                         |                                   |               |
| Halogeometricum                                        | G                                 | -             |
| <i>Halogeometricum borinquense</i> PR3, DSM 11551      |                                   |               |
| Halomicrobium                                          | G                                 | -             |
| <i>Halomicrobium mukohataei</i> arg-2, DSM 12286       |                                   |               |
| Halorhabdus                                            | G                                 | -             |
| <i>Halorhabdus utahensis</i> AX-2, DSM 12940           |                                   |               |
| Natronomonas                                           | G                                 | -             |
| <i>Natronomonas pharaonis</i> DSM 2160                 |                                   |               |
| Halogeometricaceae                                     |                                   |               |
| Haloquadratum                                          | G                                 | -             |
| <i>Haloquadratum walsbyi</i> DSM 16790                 |                                   |               |
| Halorubraceae                                          |                                   |               |
| Halorubrum                                             | G                                 | -             |
| <i>Halorubrum lacusprofundi</i> ATCC 49239             |                                   |               |
| unclassified                                           |                                   |               |
| Natrialba                                              | G                                 | -             |
| <i>Natrialba magadii</i> ATCC 43099                    |                                   |               |
| Methanobacteria                                        |                                   |               |
| Methanobacteriales                                     |                                   |               |
| Methanobacteriaceae                                    |                                   |               |
| Methanobrevibacter                                     | T                                 | +             |
| <i>Methanobrevibacter smithii</i> ATCC 35061           |                                   |               |
| <i>Methanobrevibacter smithii</i> DSM 2375             |                                   |               |
| <i>Methanobrevibacter smithii</i> F1, DSM 2374         |                                   |               |
| Methanosphaera                                         | T                                 | +             |
| <i>Methanosphaera stadtmanae</i> DSM 3091              |                                   |               |
| Methanothermobacter                                    | T                                 | +             |
| <i>Methanothermobacter thermoautotrophicus</i> Delta H |                                   |               |

Fig. S1. Archaeal taxonomy, according to the Integrated Microbial Genomes database, is shown with the identity of the genome encoded -1 residue for tRNA<sup>His</sup> genes and the presence (+) or absence (-) of a thg1 homolog.
